# Supplementary material for: Control of Ubp3 ubiquitin protease activity by the Hog1 SAPK modulates transcription upon osmostress
Source: PubMed Central journal article supplement — EMBO J. 2011 Jul 8;30(16):3274–84. doi: 10.1038/emboj.2011.227 (PMC3160652; doi:10.1038/emboj.2011.227), 2011-07-08

**SUPPLEMENTARY INFORMATION**

**Figure S1 (A)** *UBP4* (*DOA4*) and *UBP5* mutants do not impair gene activation upon osmostress. Wild type and the indicated mutant strains were grown to mid-log phase in rich medium and then subjected to osmotic stress (0.4 M NaCl) for the indicated length of time. Total RNA was assayed by Northern blot for transcript levels of *STL1*, *CTT1* and *RDN18* (as a loading control). **(B)** *UBP3* mutant does not render osmo-sensitive cells. Wild type and the indicated mutant strains were spotted on YPD plates with or without 1 M NaCl or 2 M sorbitol. Growth was scored after 4 days.

**Figure S2** Binding of the Hog1 SAPK to the stress-responsive promoters is not affected in a *ubp3* strain. Wild type (filled bars) and *ubp3* (open bars) strains carrying HA-tagged Hog1 were grown to mid-log phase and subjected to osmostress (0.4 M NaCl) for the indicated length of time. Proteins were immunoprecipitated with anti-HA monoclonal antibodies and binding to the promoter regions of *STL1* and *CTT1* loci was analysed. The real-time PCR results are shown as the fold induction of treated relative to non-treated (time zero) samples normalized to a telomere internal control. Data represent the mean and standard deviation of three independent experiments.

**Figure S3** Ubp3<sup>S695A</sup> associates with osmo-dependent genes in response to stress. Cells expressing HA-tagged Ubp3 (filled bars) or Ubp3<sup>S695A</sup> (open bars) proteins were subjected to osmostress (0.4 M NaCl) for the indicated length of time. Proteins were immunoprecipitated with anti-HA monoclonal antibodies and binding to the promoter (left-hand panels) and ORF (right-hand panels) regions of *STL1* and *CTT1* loci was analysed. The real-time PCR results are shown as the fold induction of treated relative

to non-treated (time zero) samples normalized to a telomere internal control. Data are the mean and standard deviation of three independent experiments.

**Figure S4** Protein levels of wild type and mutated versions of Ubp3 are expressed equally in yeast cells. Ubp3-HA, Ubp3-11m-HA, Ubp3-12m-HA, Ubp3<sup>S695A</sup>-HA and Ubp3<sup>C496A</sup>-tagged proteins were expressed in a low-copy vector in *ubp3* cells. Samples were taken at mid-log phase and fixed in TCA. Protein precipitates were treated with alkaline phosphatase and HA-tagged proteins were separated by SDS-PAGE and detected by immunoblotting using monoclonal anti-HA (upper panel). The membrane was stained with Naftol blue as a loading control (lower panel).

**Figure S5** Cells lacking the phosphorylated Hog1 site of Ubp3 are not sensitive to 6-AU. Wild type and *ubp3* cells transformed with pRS416 (to yield a URA<sup>+</sup> phenotype required for 6-AU sensitivity tests) and with the indicated plasmids were spotted onto yeast minimal plates lacking uracil and with or without 100 µg/ml 6-AU. The culture was scored after 3 days.

**Figure S6 (A)** Ubp3 is not required for *ADHI* mRNA production when expressed by the LexA-VP16 activator. *ubp3*Δ cells lacking endogenous *ADHI* and expressing an empty vector, a single copy of wild type Ubp3 or the unphosphorylatable mutant Ubp3<sup>S695A</sup> were transformed with a vector carrying *ADHI* under the LexA promoter and with a plasmid containing the LexA binding domain fused to the VP16 transcriptional activator. Cells were treated with 0.4 M NaCl for the indicated length of time and transcript levels of *ADHI* and *RDN18* (as loading control) were measured. **(B)** The phosphorylation site of Ubp3 is required for proper RNA Pol II occupancy at *STL1*

open-reading frame in the *LexA-STLI* locus. *ubp3Δ* cells lacking endogenous *STLI* were transformed with a vector carrying *STLI* under the LexA promoter and with a plasmid containing the LexA binding domain fused to the VP16 transcriptional activator. This strain was transformed with an empty vector as a control, a wild type Ubp3 and the unphosphorylatable Ubp3<sup>S695A</sup> proteins. Cells were subjected to osmostress (0.4 M NaCl, 10 minutes; open bars) or not (filled bars) and binding of Rpb1 to the *STLI* ORF region of the *LexA-STLI* construct was analysed by ChIP using anti-Rpb1 antibody (8WG16, Covance). The real-time PCR results are shown as the fold induction of treated relative to non-treated (time zero) samples normalized to a telomere internal control. Data are the mean and standard deviation of three independent experiments.

**Figure S7 (A)** Hog1 directly associates with Ubp3 *in vitro*. GST, GST-Ubp3 or His-Hog1 were expressed and purified from *E. coli*. GST proteins were incubated with His-Hog1 bound to beads and interacting proteins were probed using GST antibody (bound). Input represents 10% of total purified proteins. **(B)** *In vivo* binding of RNA Pol II and Ubp3 is not affected by osmostress or Hog1. Ubp3-HA-tagged protein was expressed from the wild type locus in wild type and *hog1* strains. Samples were taken before (–) or 10 min after (+) the addition of 0.4 M NaCl. The largest subunit of RNA Pol II (Rpb1) was immunoprecipitated with commercial anti-Rpb1 antibody (bottom) and the presence of Ubp3-HA was probed by immunoblotting using anti-HA antibodies (top). Total extract represents 50% of total input protein (middle).

**A**

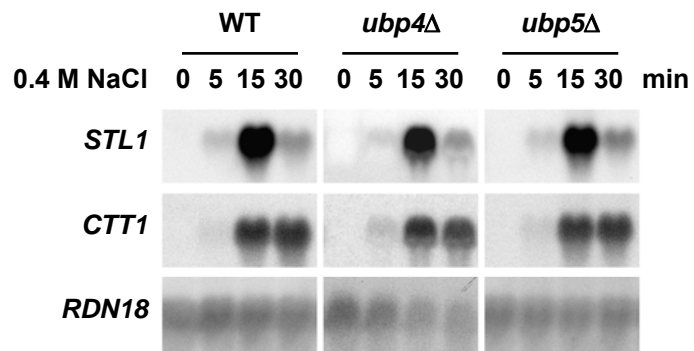

**B**

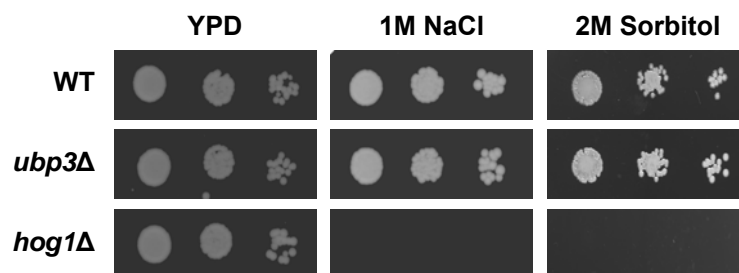

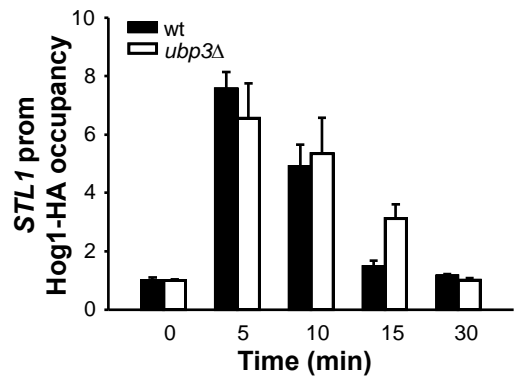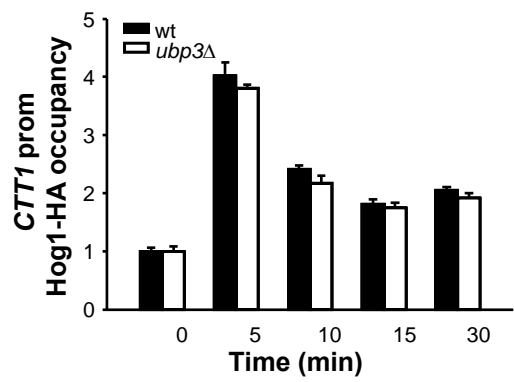

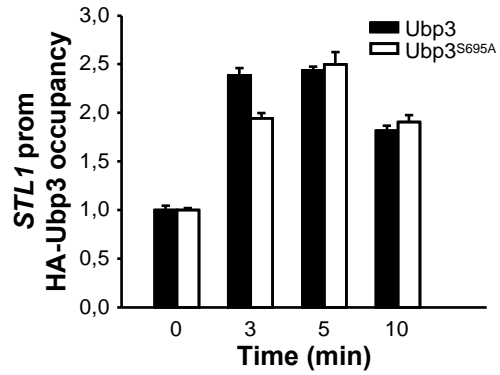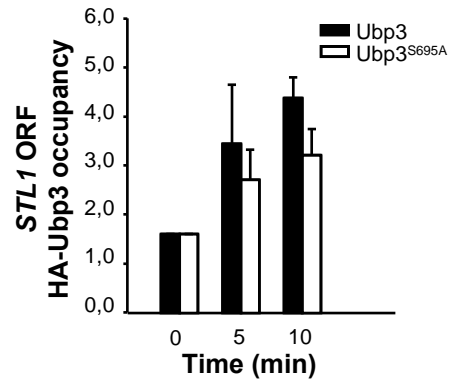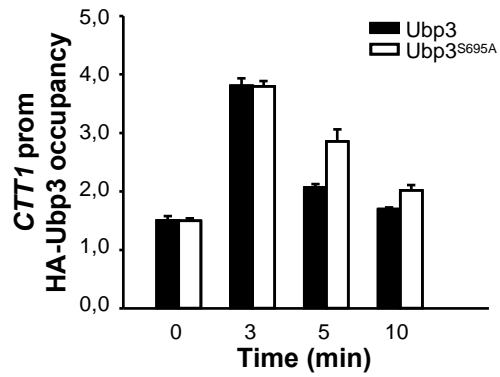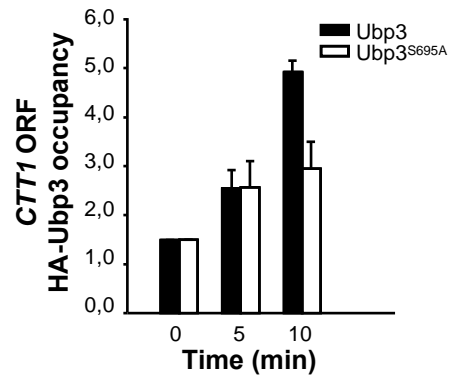

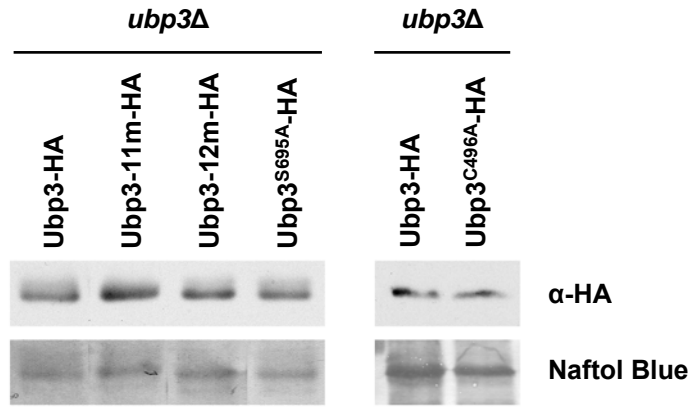

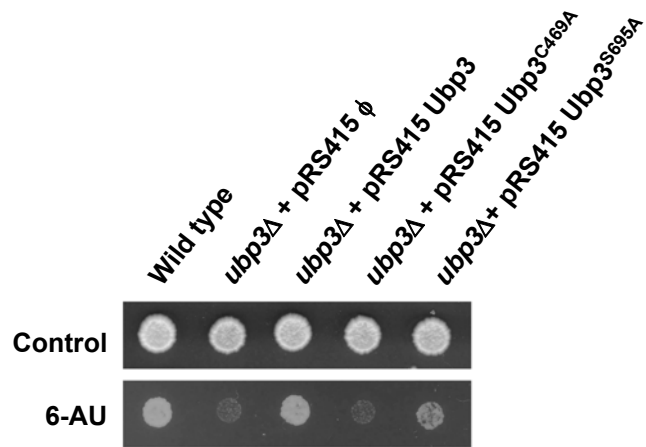



**A**

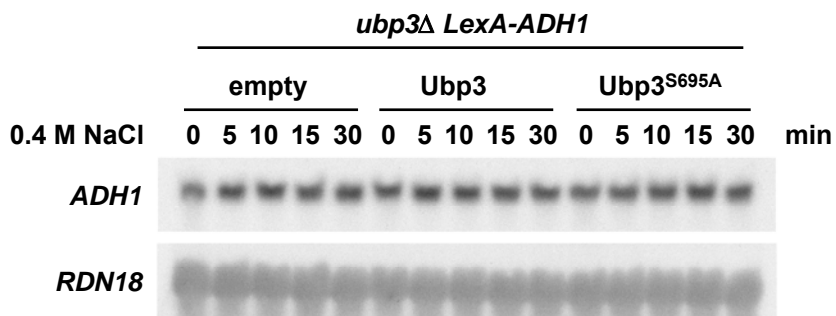

**B**

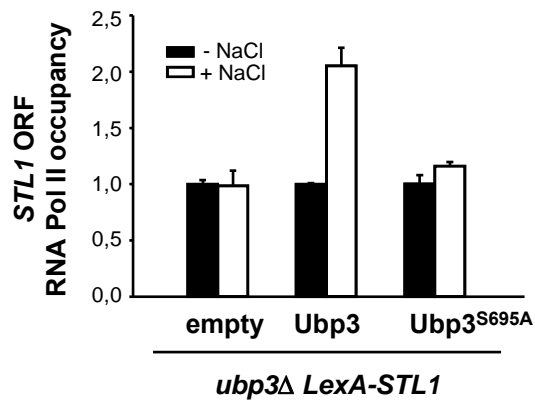

Supplement: emboj2011227s1.pdf [file emboj2011227s1.pdf]
